# Supplementary material for: MicroRNAs 17-5p–20a–106a control monocytopoiesis through AML1 targeting and M-CSF receptor upregulation
Source: Springer Nature journal article supplement (doi:10.1038/ncb1613), 2007-06-22
Supplement: 41556_2007_BFncb1613_MOESM248_ESM.pdf [file 41556_2007_BFncb1613_MOESM248_ESM.pdf]

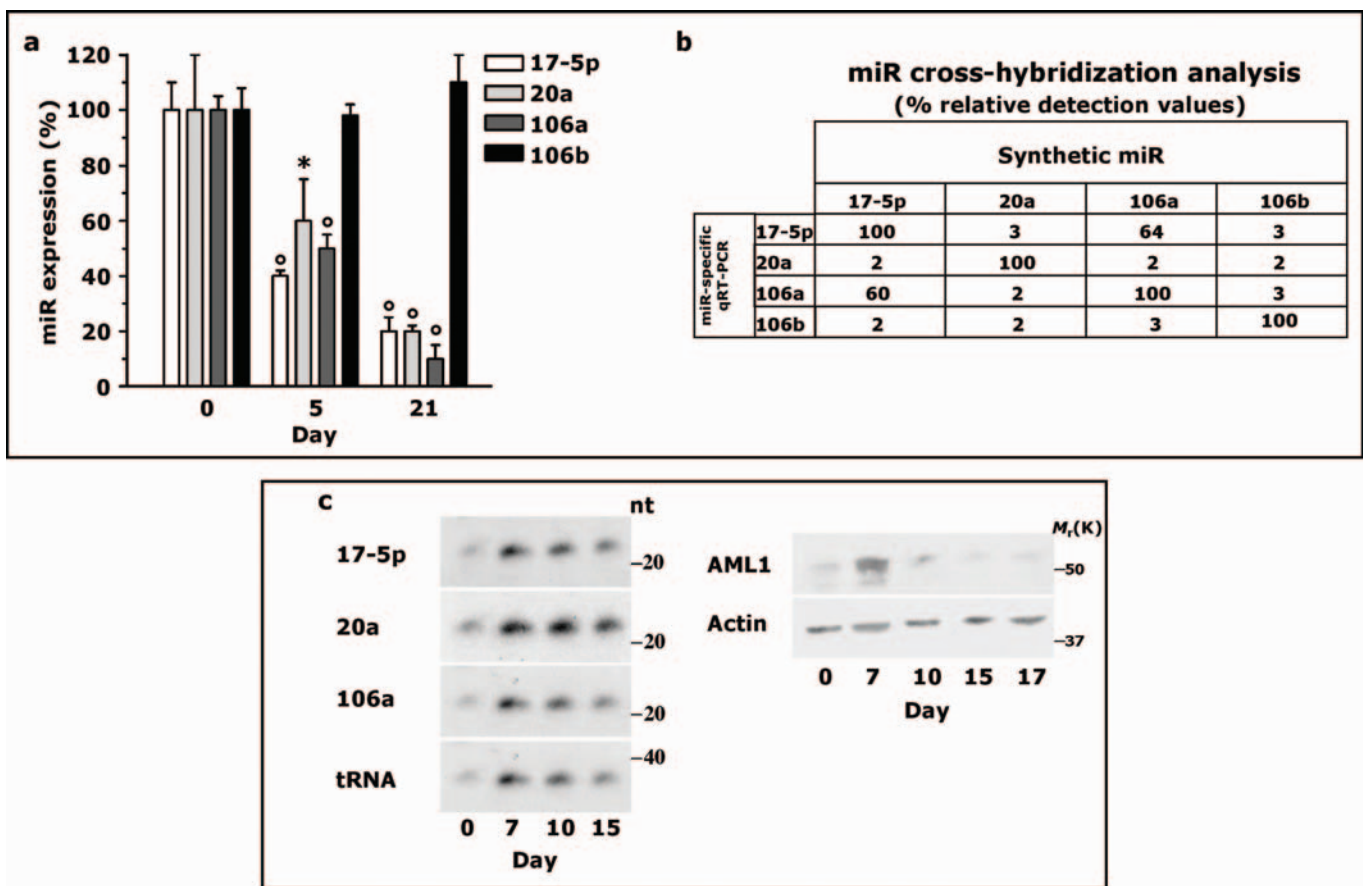

**Figure S1** miR-17-5p/20a/106a expression in Mo and E cultures and cross-hybridization studies among miR-17-5p/20a/106a/106b. (a) miR-qRT-PCR analysis of miR-17-5p, -20a, -106a and -106b (normalized to U6) in CD34+ HPCs (day 0) and at sequential days of Mo culture (mean  $\pm$  s.d., n=3). Percent expression values are shown. \*  $P < 0.05$ ,  $^{\circ} < 0.001$ . (b) miR-qRT-PCR analysis of RNA from Jurkat cells transfected with synthetic miR-17-5p,

-20a, -106a or -106b (160 nM) at 48 hr post-transfection. miR-specific assays were used for detection of each miRNA. Percent values are indicated. (c) Northern blot of miR-17-5p, -20a and -106a expression (left) and Western blot analysis of AML1 expression (right) in CD34+ HPCs (day 0) and unilineage E culture at sequential culture days. Representative experiments out of three are presented.

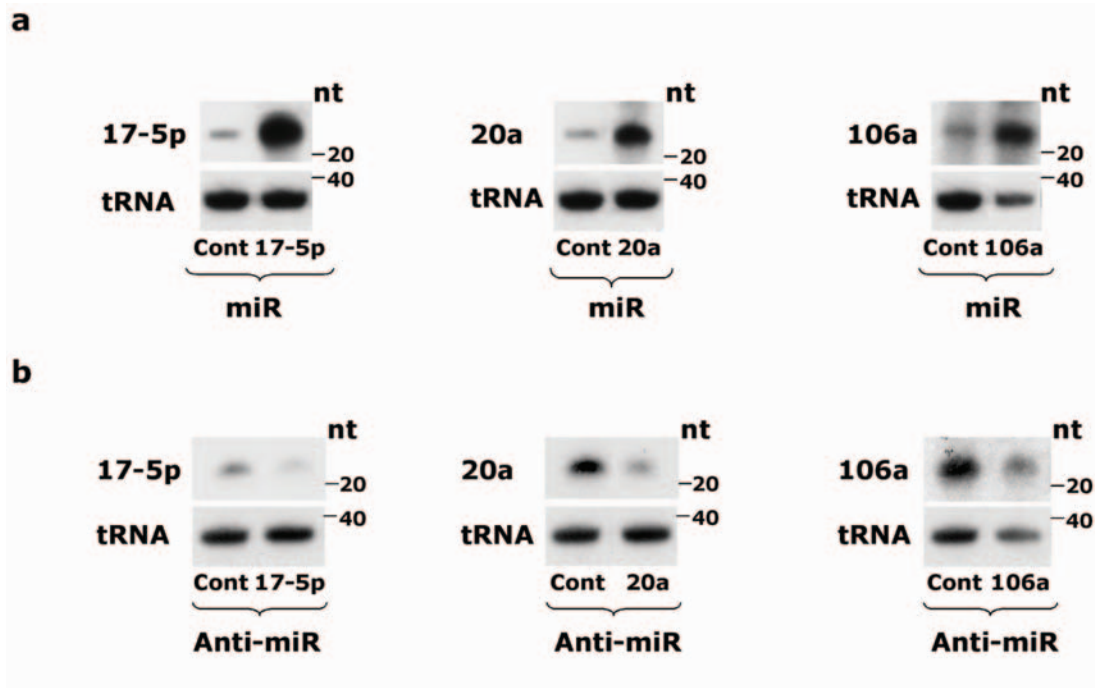

**Figure S2** Overexpression of miR-17-5p, -20a and -106a or anti-miR oligonucleotides recognizing these miRs in Jurkat cell line. (a) Northern blot analysis of RNA from Jurkat cells transfected with miR-17-5p, -20a and -106a or a control scrambled oligonucleotide (Cont) (160 nM) at 48 hr post-transfection. Met-tRNA was used as a loading control. A representative

experiment out of three is presented. (b) Northern blot analysis of RNA from Jurkat cells transfected with anti-miR oligonucleotides recognizing miR-17-5p, -20a and -106a (160 nM) at 48 hr post-transfection. A representative experiment out of three is shown.

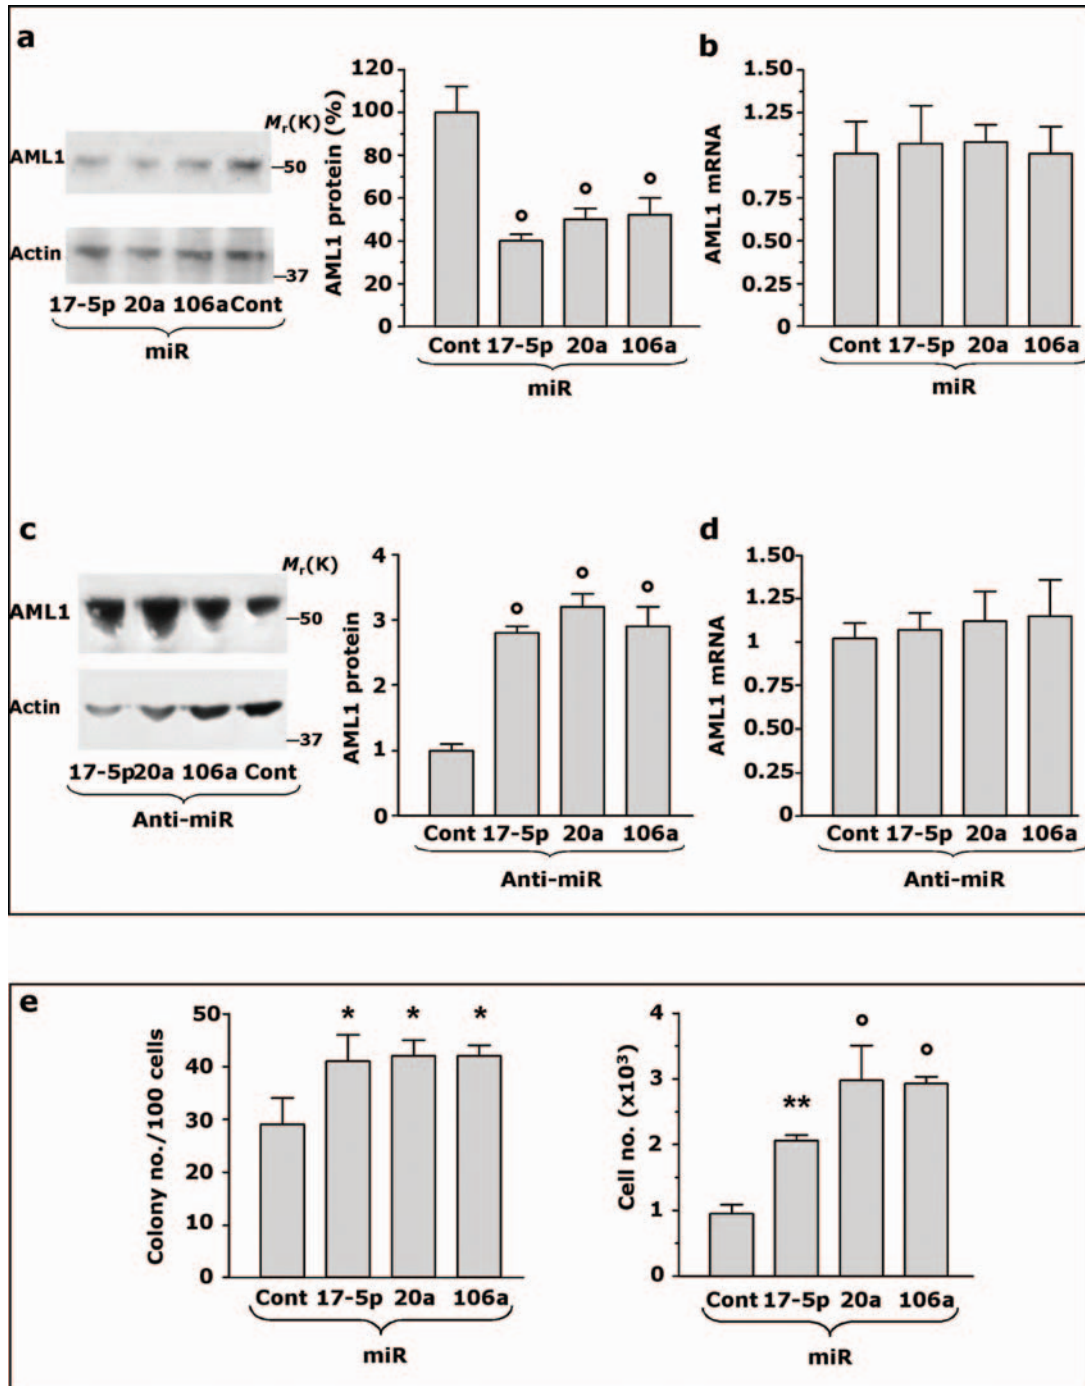

**Figure S3** AML1 expression is translationally regulated by miR-17-5p, -20a and -106a in Jurkat cell line. (a) *Left panel.* AML1 protein expression by Western blot in Jurkat cells transfected with miR-17-5p, -20a and -106a or a control scrambled oligonucleotide (Cont) (160 nM), 72 hr post-transfection. Actin was used for normalization. A representative experiment out of three is shown. *Right panel.* Quantification of Western blot analysis from three independent experiments. Percentage of normalized AML1 is indicated; mean  $\pm$  s.d., n = 3. (b) AML1 mRNA, measured by Real-Time PCR, in Jurkat cells transfected with miRNAs; mean  $\pm$  s.d., n = 3. (c) *Left panel.* AML1 protein expression by Western blot in Jurkat cells transfected with anti-miR oligonucleotides recognizing miR-17-5p, -20a and -106a

or a control anti-miR oligonucleotide (Cont) (160 nM) at 72 hr post-transfection. A representative experiment out of three is presented. *Right panel.* Quantification of Western blot analysis of AML1 protein in three independent experiments (fold induction of normalized values, mean  $\pm$  s.d., n = 3). (d) AML1 mRNA level in Jurkat cells transfected with anti-miR oligonucleotides (mean  $\pm$  s.d., n = 3). (e) Overexpression of miR-17-5p, -20a and -106a (300 nM) in Mo culture affects Mo colony formation. *Left panel.* Number of Mo colonies generated per 100 cells seeded (mean  $\pm$  s.d., n = 3). *Right panel.* Number of cells per colony (mean  $\pm$  s.d., n = 3). \* P < 0.05, \*\* < 0.01, ° < 0.001 when compared to control groups.

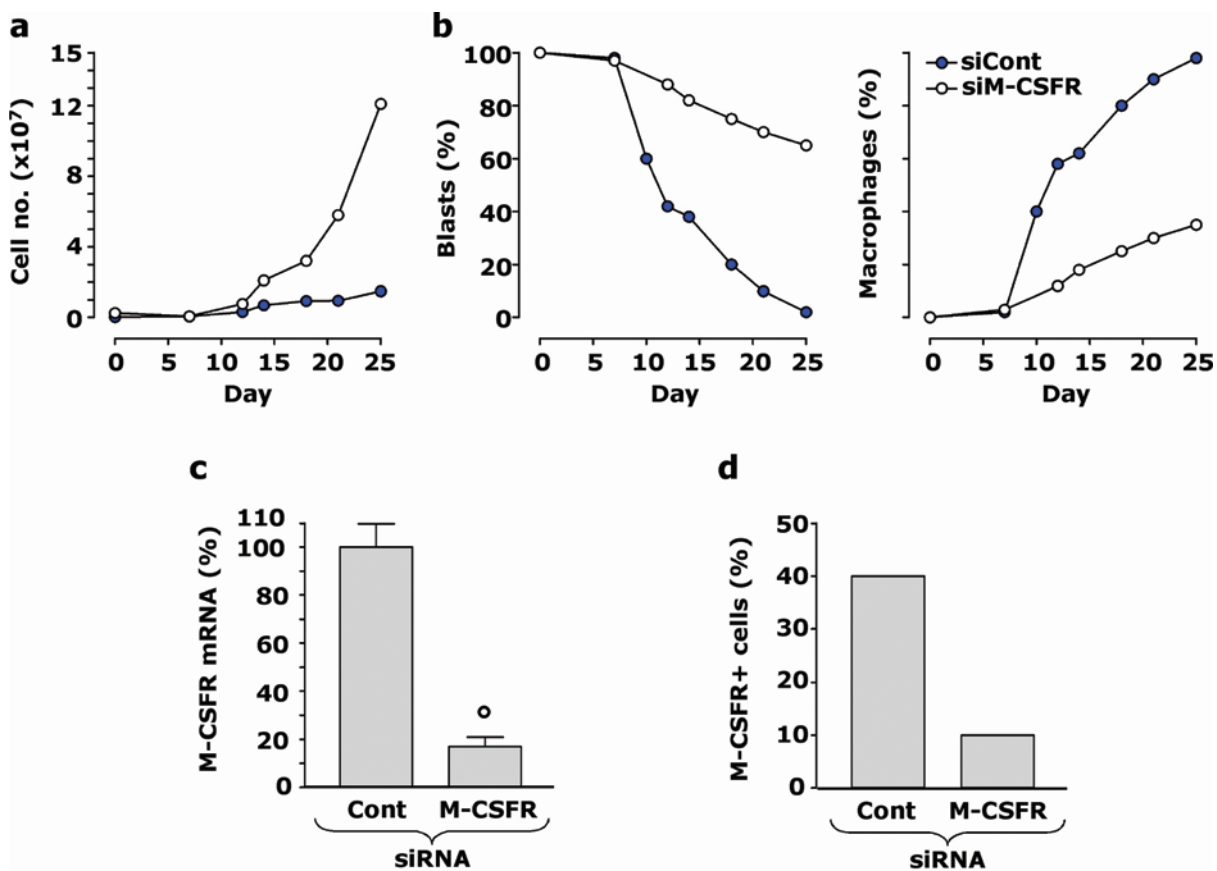

**Figure S4** Inhibition of M-CSFR expression by small-interfering RNA (siRNA) treatment affects monocytopoiesis. A representative experiment out of three is presented (except for panel c). (a) Growth curve of Mo culture cells transfected with siRNA targeting M-CSFR mRNA (siM-CSFR) or a control oligonucleotide (siCont). (b) Wright-Giemsa staining of transfected Mo at various days of differentiation: percentage of blasts (left) and macrophages

(right) is shown. (c) M-CSFR mRNA expression by Real-Time PCR in transfected cells at 72 hr post-transfection (mean  $\pm$  s.d.,  $n = 3$ ).  $^{\circ} P < 0.001$  when compared to control. (d) FACS analysis of M-CSFR expression in transfected cells on day 10 of Mo culture. Percent values of M-CSFR cells are presented.

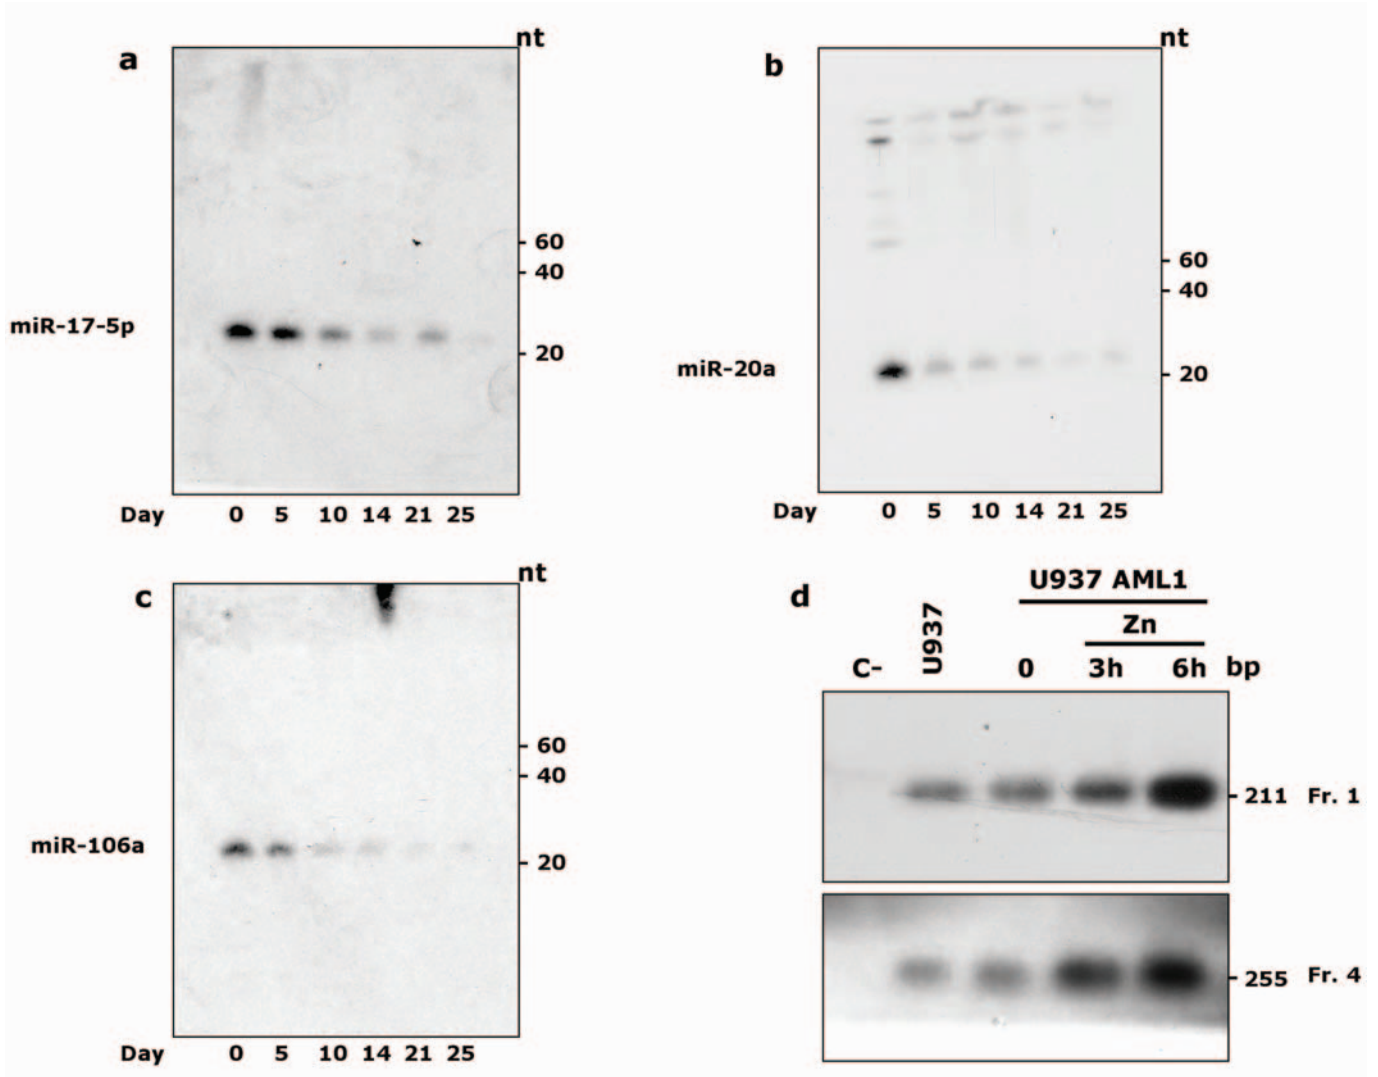

Figure S5 Full length scan of gels showed in Figure 1 (panels a-c) and Figure 7 (panel d).

| <u>Gene Symbol</u> | <u>Gene Id</u> | <u>Gene Accession</u> | <u>Scale</u> | <u>Pool Catalog Number</u> | <u>Duplex Catalog Number</u> | <u>Sequence</u>     |
|--------------------|----------------|-----------------------|--------------|----------------------------|------------------------------|---------------------|
| RUNX1              | 861            | NM_001754 (RUNX1)     | 5 nmol       | L-003926-00                | J-003926-05                  | UGACAACCCUCUCUGCAGA |
| RUNX1              | 861            | NM_001754 (RUNX1)     | 5 nmol       | L-003926-00                | J-003926-06                  | GAAACUAGAUGAUCAGACC |
| RUNX1              | 861            | NM_001754 (RUNX1)     | 5 nmol       | L-003926-00                | J-003926-07                  | CGAUAGGUCUCACGCAACA |
| RUNX1              | 861            | NM_001754 (RUNX1)     | 5 nmol       | L-003926-00                | J-003926-08                  | CAAUGAUCUGGUGGUUUAU |
| CSF1R              | 1436           | NM_005211 (CSF1R)     | 5 nmol       | L-003109-00                | J-003109-10                  | GGAAGAUCAUCGAGAGCUA |
| CSF1R              | 1436           | NM_005211 (CSF1R)     | 5 nmol       | L-003109-00                | J-003109-11                  | GGUGAAGGAUGGAUACCAA |
| CSF1R              | 1436           | NM_005211 (CSF1R)     | 5 nmol       | L-003109-00                | J-003109-12                  | GUAACGUGCUGUUGACCAA |
| CSF1R              | 1436           | NM_005211 (CSF1R)     | 5 nmol       | L-003109-00                | J-003109-13                  | CCAGCAGCGUUGAUGUUA  |
